# Supplementary material for: Novel insertion of ethynylbenzene derivatives bearing an electron-withdrawing substituent at the 4-position into a P–C bond and their transannular insertion between a metal atom and an ipso-carbon atom of the phosphine ligand †
Source: Royal Society of Chemistry journal article supplement (doi:10.1039/b004984k), 2000-01-01
Supplement: b004984k.doc [file b004984k.doc]

**Supplementary information (spectroscopic data)**

† Elemental analyses of all new complexes prepared here were in good agreement with the calculated values. **3a** (20%): IR(nujol): 1717 (C=O), 839 (PF6) cm-1. 1H NMR (CD2Cl2): 1.36 (d, JPH = 2.7 Hz, C5*Me5*), 3.35 (s, *Me*O), 3.88 (s, COO*Me*), 3.95 (S, COO*Me*), 6.49 (d, JHH = 8.5Hz, C=C*H*), 8,19 (d, JHH = 8.5 Hz), 6.5-7.7 (m, Ph) ppm. 31P{1H} NMR (CD2Cl2): 35.8 (d, JRhP = 157.8 Hz), -144.8 (sep., JPF = 712.5 Hz) ppm. **3b** (24%): IR(nujol): 1721 (C=O), 843 (PF6) cm-1. FAB mass (M/z) 954 ([M-PF6]+, 794 ([M-PF6-HC=CC6H3COOMe]+, 635 ([M-PF6-2HC=CC6H3COOMe]+ 1H NMR (CDCl3): 1.29 (d, JPH = 2.1 Hz, C5*Me5*), 3.67 (s, *Me*O), 3.89 (s, COO*Me*), 3.90 (s, COO*Me*), 5.27 (d, JHH = 7.8Hz, C=C*H*), 6.74 (d, JHH = 7.8 Hz, C=C*H*), 6.5-7.9 (m, Ph) ppm. 31P{1H} NMR (CD2Cl2): 21.9 (s), -143.8 (sep., JPF = 712.0 Hz) ppm. **4a** (19%): IR(nujol): 3285 (OH), 1717 (C=O), 1605 (C=C) cm-1. 1H NMR (CD2Cl2): 1.41 (d, JPH = 3.5 Hz, C5*Me5*), 3.44 (s, *Me*O), 3.83 (s, COO*Me*), 6.74 (s, O*H*), 5.8-8.0 (m, Ph) ppm. 31P{1H} NMR (CD2Cl2): 29.7 (d, JRhP = 136.7 Hz) ppm. FAB mass (m/z): 954 ([M-PF6]+), 794 ([M-PF6-HC=C6H4CO2Me]+), 635 ([M-PF6-(HC=C6H4CO2Me)-(C=CC6H3COOMe)]+). **4b** (24%): IR(nujol): 3312 (OH), 1717 (C=O), 1609 (C=C) cm-1. 1H NMR (CDCl3): 1.44 (d, JPH = 2.2 Hz, C5*Me5*), 3.45 (s, *Me*O), 3.84 (s, COO*Me*), 6.64 (s, O*H*), 5.8-8.0 (m, Ph) ppm. 31P{1H} NMR (CDCl3): 3.54 (s) ppm. FAB mass (m/z): 954 ([M-1]+). **5ac** (43%): IR(nujol): 1715 (C=O), 1630 (C=O), 839 (PF6) cm-1. 1H NMR (CDCl3): 1.74 (d, JPH = 3.4 Hz, C5*Me5*), 2.97 (s, *Me*O), 3.06 (br, *Me*O), 3.49 (br, *Me*O), 3.84 (s, COO*Me*), 5.59 (d, JRhH = 7.3 Hz, CH=), 5.6-8.2 (m, Ph and ring protons) ppm. 31P{1H} NMR (CDCl3): 38.7 (d, JRhH = 152.7 Hz), -143.7 (sep. JPF = 712.2 Hz) ppm. FAB mass (m/z): 765 ([M-PF6]+), 605 ([M-PF6-HC=CC6H4CO2Me]+). **5ad** (18%): IR(nujol): 1628 (C=O), 835 (PF6) cm-1. 1H NMR (CD2Cl2): 1.74 (d, JPH = 3.4 Hz, C5*Me5*), 2.99 (s, *Me*O), 3.08 (br, *Me*O), 3.52 (br, *Me*O), 5.68 (d, JRhH = 7.5Hz, CH=), 6.4-8.2 (m, Ph and ring protons) ppm. 31P{1H} NMR (CDCl3): 40.4 (d, JRhH = 152.7 Hz), -143.7 (sep. JPF = 712.2 Hz) ppm. FAB mass (m/z): 752 ([M-PF6]+), 605 ([M-PF6-HC=CC6H4NO2]+).
